# Supplementary material for: Single-dose SARS-CoV-2 vaccine in a prospective cohort of COVID-19 patients
Source: bioRxiv or medRxiv preprint supplement (doi:10.1101/2021.05.25.21257797), 2021-05-25
Supplement: Supplementary file [file media-1.pdf]

## Supplementary Materials for

### Single-dose SARS-CoV-2 vaccine in a prospective cohort of Covid-19 patients

Marit J. van Gils<sup>1</sup>, Hugo D. van Willigen<sup>1#</sup>, Elke Wynberg<sup>1,2#</sup>, Alvin X. Han<sup>1</sup>, Karlijn van der Straten<sup>1,3</sup>, Anouk Verveen<sup>4</sup>, Romy Lebbink<sup>2</sup>, Maartje Dijkstra<sup>2,3</sup>, Judith A. Burger<sup>1</sup>, Melissa Oomen<sup>1</sup>, Khadija Tejjani<sup>1</sup>, Joey H. Bouhuijs<sup>1</sup>, Brent Appelman<sup>5</sup>, Ayesha H.A. Lavell<sup>6</sup>, Meliawati Poniman<sup>1</sup>, Tom G. Caniels<sup>1</sup>, Ilja Bontjer<sup>1</sup>, Lonneke A. van Vught<sup>5,7</sup>, Alexander P.J. Vlaar<sup>7</sup>, Jonne J. Sikkens<sup>6</sup>, Marije K. Bomers<sup>6</sup>, Rogier W. Sanders<sup>1,8</sup>, Neeltje A. Kootstra<sup>9</sup>, Colin Russell<sup>1</sup>, Maria Prins<sup>2,3</sup>, Godelieve J. de Bree<sup>3‡</sup>, Menno D. de Jong<sup>1‡</sup>, RECOVERED Study Group\*

Correspondence to: [m.d.dejong@amsterdamumc.nl](mailto:m.d.dejong@amsterdamumc.nl); [g.j.debree@amsterdamumc.nl](mailto:g.j.debree@amsterdamumc.nl)

**This PDF file includes:**

Figure S1 to S4

Table S1 to S6

Supplementary Methods

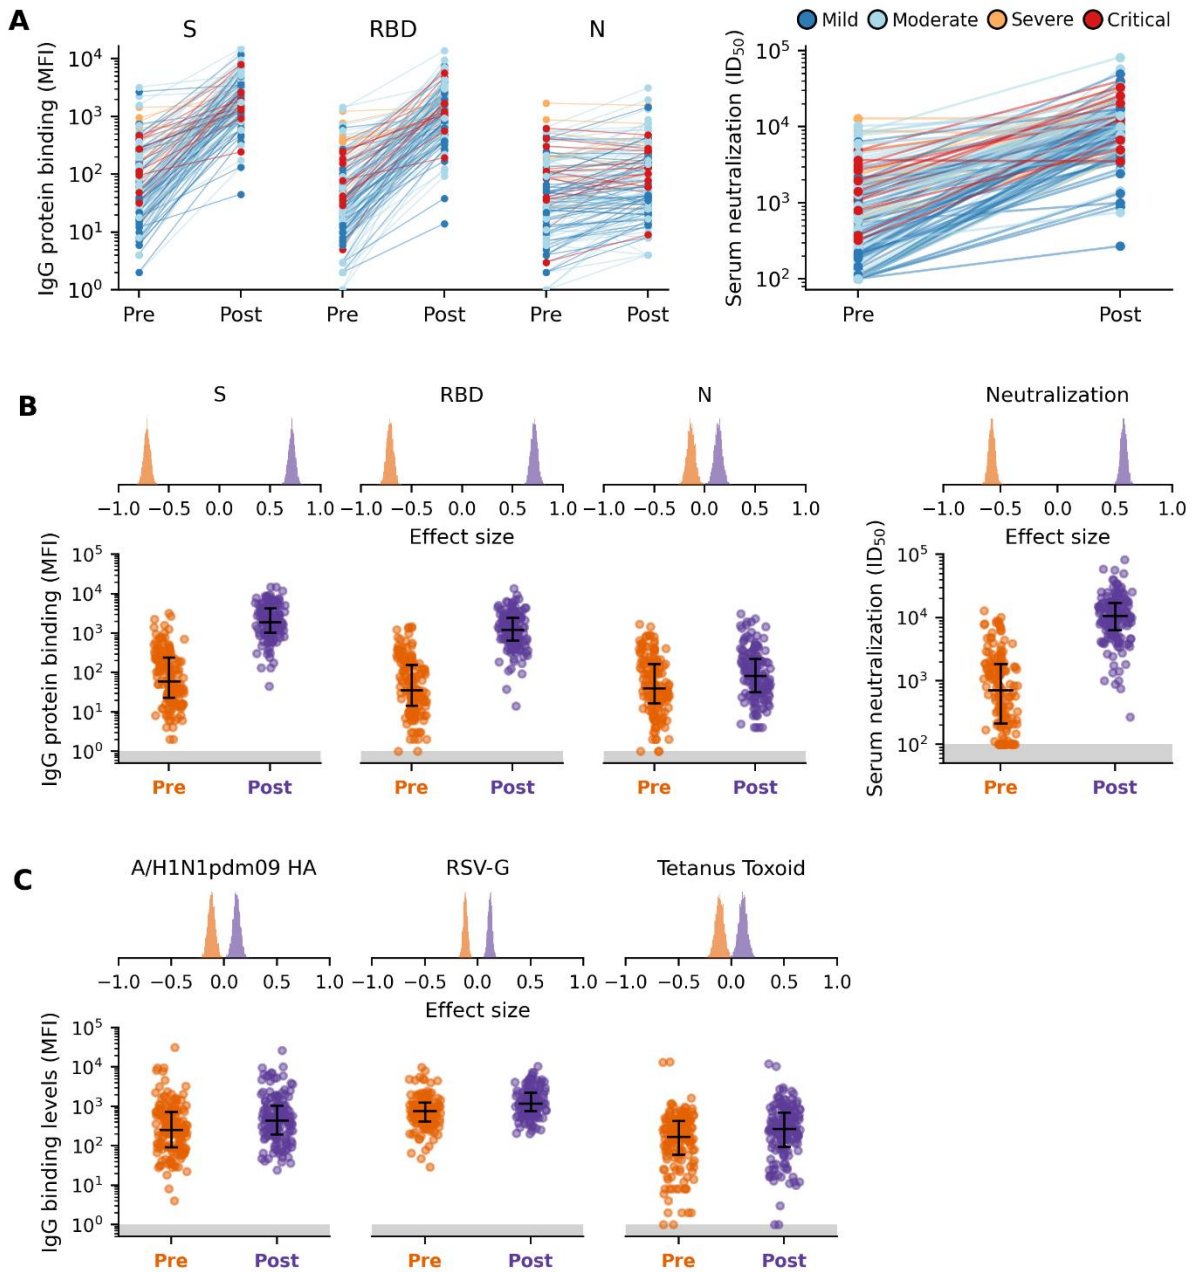

**Figure S1: Anti-SARS-CoV-2 antibody responses after mRNA vaccination**

(A) Paired pre- and post-vaccination IgG binding levels to S, RBD and N protein (left panel) and serum neutralization levels to WT SARS-CoV-2 (right panel). Each line between pre- and post-vaccination data points show the changes in binding levels for a study participant (colored by disease severity). (B) Pre- (orange) and post-vaccination (purple) distributions of IgG binding levels to S, RBD and N (left panel) and serum neutralization of SARS-CoV-2 (right panel). (C) Pre- and post-vaccination distributions of IgG binding levels to other human pathogens including influenza A/H1N1pdm09 haemagglutinin (HA) protein, respiratory syncytial virus glycoprotein (RSV-G) and Tetanus toxoid. The corresponding distribution of mean effect size estimates (Table S3) using a Bayesian ANOVA model is shown above each response distribution plot for (B) and (C).

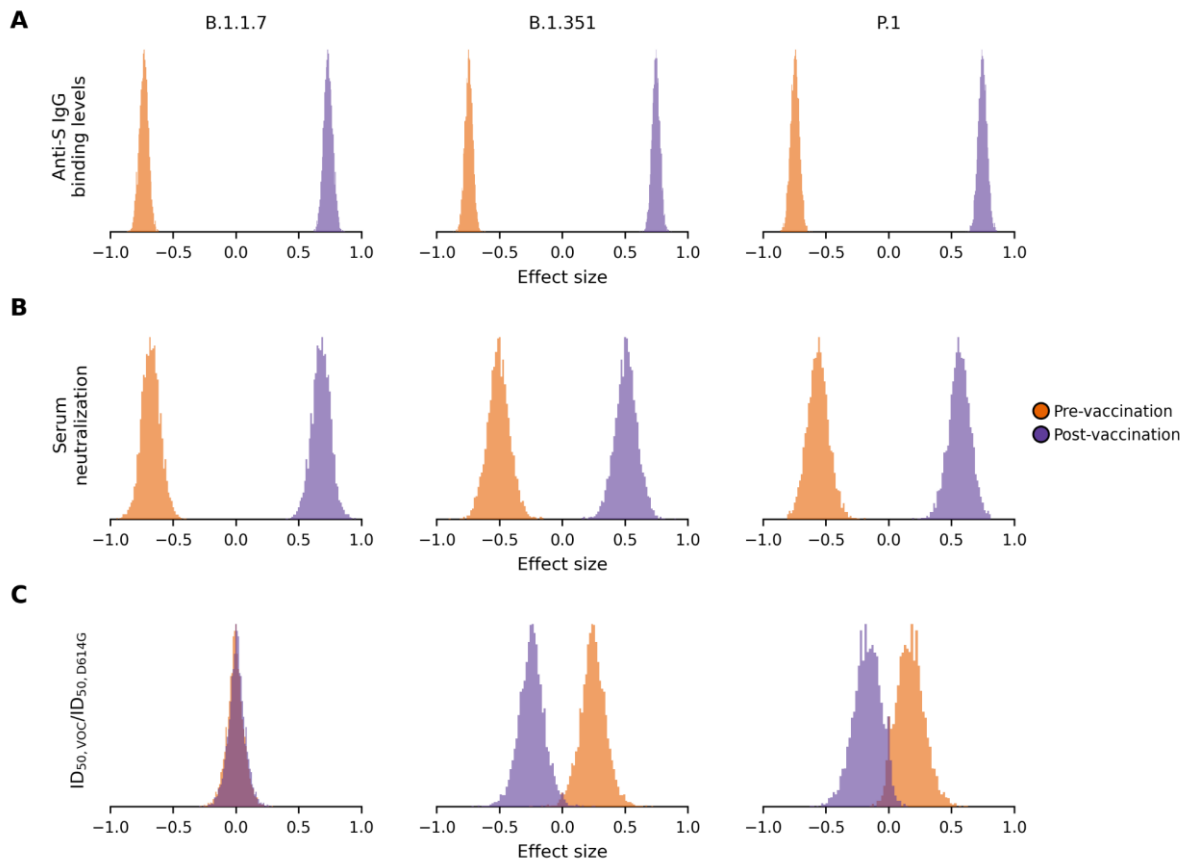

**Figure S2: Effect size estimates of pre- and post-vaccination antibody response after mRNA vaccination**

Pre- (orange) and post-vaccination (purple) distributions of mean effect size estimates (Table S4) using a Bayesian ANOVA model for **(A)** anti-S IgG binding, **(B)** serum neutralization levels and **(C)** ratio of neutralization against VOC to WT (D614G) for lineage B.1.1.7, B.1.351 and P.1.

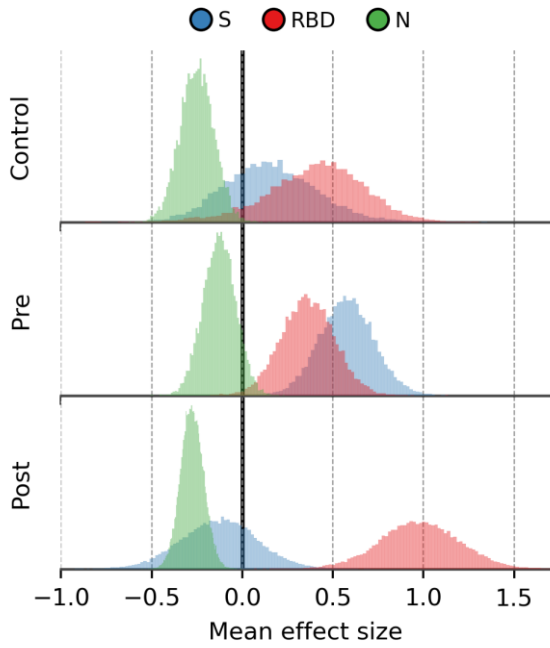

**Figure S3: Joint contributions of IgG binding to different SARS-CoV-2 antigens on control pre- and post-vaccination serum neutralization levels.**

The mean effects across study participants were estimated using a Bayesian multilevel model. All continuous predictors were mean-centered and scaled such that effect sizes shown can be compared on a common scale. S, spike protein; RBD, receptor binding domain protein; N, nucleocapsid protein

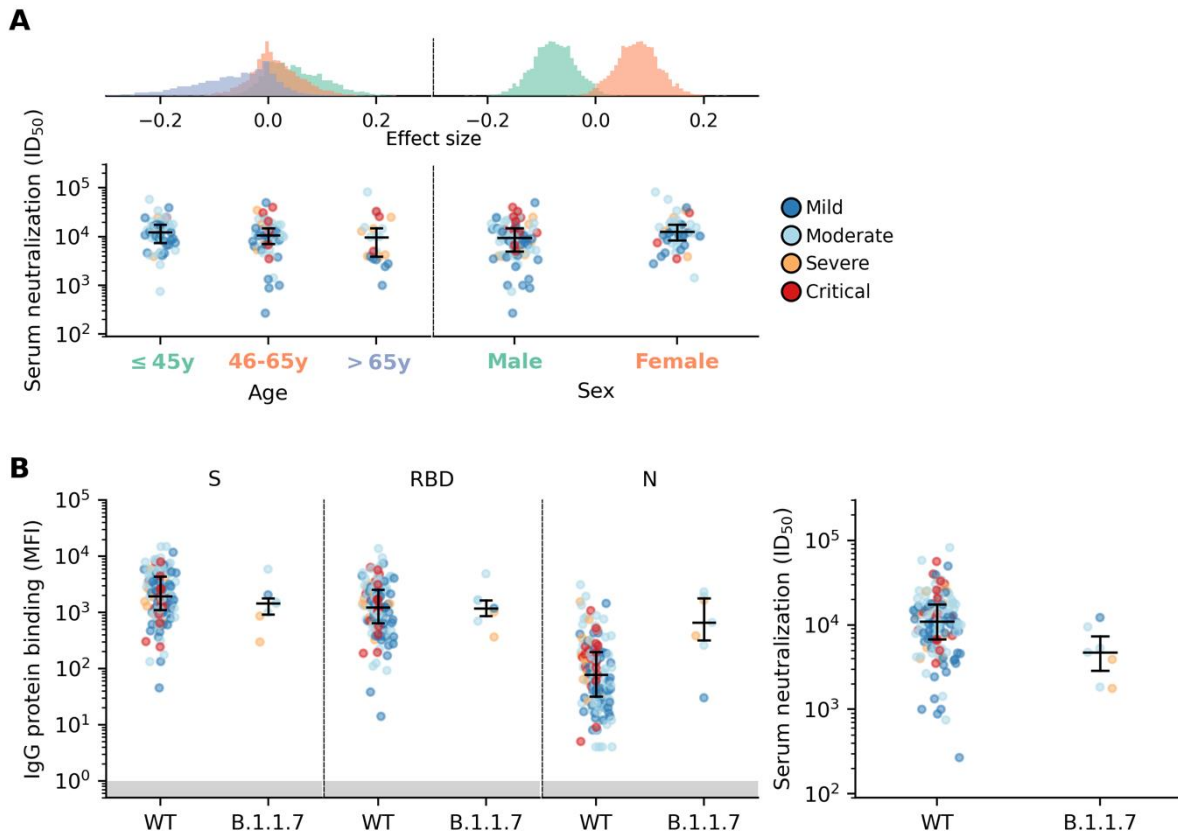

**Figure S4: Anti-SARS-CoV-2 antibody responses after mRNA vaccination stratified by age, sex and infection by lineage B.1.1.7.**

(A) Distributions of mean effect size estimates using a Bayesian ANOVA model (top) and post-vaccination serum neutralization levels (bottom) of study participants stratified according to age and sex. (B) Distributions of post-vaccination serum IgG binding and neutralization levels of study participants stratified according to the lineage of the infecting virus (wild-type (WT) or B.1.1.7).

**Table S1: Analyses performed using the Bayesian multilevel joint-contribution model**

| Analysis                                                                                  | Observed variable                      | Predictor variable                                                                                                                                                                                                                                                                                                                                                                                                                                                                                                           |
|-------------------------------------------------------------------------------------------|----------------------------------------|------------------------------------------------------------------------------------------------------------------------------------------------------------------------------------------------------------------------------------------------------------------------------------------------------------------------------------------------------------------------------------------------------------------------------------------------------------------------------------------------------------------------------|
| Correlating pre-vaccination neutralization titers to anti-SARS-CoV-2 IgG binding levels   | Pre-vaccination neutralization titers  | Pre-vaccination IgG binding levels to spike, RBD and nucleoprotein (all continuous)                                                                                                                                                                                                                                                                                                                                                                                                                                          |
| Correlating post-vaccination neutralization titers to anti-SARS-CoV-2 IgG binding levels  | Post-vaccination neutralization titers | Post-vaccination IgG binding levels to spike, RBD and nucleoprotein (all continuous)                                                                                                                                                                                                                                                                                                                                                                                                                                         |
| Correlating post-vaccination neutralization titers to participant-specific meta variables | Post-vaccination neutralization titers | Age (categorical; ≥45years, 46-65years, >65years)<br>Sex (binary, male or female)<br>Severity (categorical; mild, moderate, severe / critical)<br>Time since symptom onset (categorical; ≥6 months, 7-12 months, >12 months)<br>Pre-vaccination neutralization titers (continuous)<br>Comorbidities (i.e. cancer, cardiovascular diseases, chronic respiratory disease, diabetes mellitus, obesity; binary, presence or absence)<br>Participant infected with the B.1.1.7 lineage variant (i.e. binary, presence or absence) |

**Table S2: Symptoms post-vaccination**

| Side effects           | No. of participants (%) |
|------------------------|-------------------------|
| Local                  |                         |
| Injection site pain    | 130 (83.9%)             |
| Injection site redness | 8 (5.2%)                |
| Injection site swollen | 19 (12.3%)              |
| Systemic               |                         |
| Fatigue                | 75 (48.4%)              |
| Fever                  | 31 (20.0%)              |
| Headache               | 55 (35.5%)              |
| Cold shivers           | 34 (21.9%)              |
| Myalgia                | 41 (26.5%)              |
| Arthralgia             | 13 (8.4%)               |
| Nausea/vomiting        | 10 (6.5%)               |
| Diarrhoea              | 6 (3.9%)                |

**Table S3: Bayesian ANOVA regression results: IgG binding**

| IgG binding levels (MFI)           |                     |        |        | Bayesian ANOVA results |                       |             |      |           |
|------------------------------------|---------------------|--------|--------|------------------------|-----------------------|-------------|------|-----------|
| Variable                           | Interquartile range |        |        | Variable               | 95% credible interval |             | ESS  | $\hat{R}$ |
|                                    | Median              | Lower  | Upper  |                        | Lower                 | Upper       |      |           |
| Anti-S IgG against WT SARS-CoV-2   |                     |        |        |                        |                       |             |      |           |
| Control                            | 887.3               | 479.9  | 1649.6 | Control                | 0.14                  | 0.33        | 962  | 1.00      |
| Pre                                | 60.0                | 23.0   | 242.0  | Pre                    | -0.91                 | -0.74       | 956  | 1.00      |
| Post                               | 1888.0              | 1028.0 | 4233.0 | Post                   | 0.52                  | 0.67        | 954  | 1.00      |
|                                    |                     |        |        | Diff (Post-Control)    | 0.23                  | 0.51        |      |           |
|                                    |                     |        |        | Diff (Pre-Control)     | -1.24                 | -0.91       |      |           |
| Fold change (Post-Pre/Pre)         | 29.4                | 9.1    | 92.1   | Diff (Post-Pre)        | <b>1.30</b>           | <b>1.55</b> |      |           |
| Anti-RBD IgG against WT SARS-CoV-2 |                     |        |        |                        |                       |             |      |           |
| Control                            | 1406.4              | 725.1  | 2543.1 | Control                | 0.40                  | 0.59        | 1041 | 1.01      |
| Pre                                | 36.0                | 14.5   | 158.0  | Pre                    | -1.05                 | -0.87       | 1040 | 1.01      |
| Post                               | 1217.0              | 643.0  | 2457.0 | Post                   | 0.40                  | 0.55        | 1035 | 1.01      |
|                                    |                     |        |        | Diff (Post-Control)    | -0.17                 | 0.12        |      |           |
|                                    |                     |        |        | Diff (Pre-Control)     | -1.64                 | -1.29       |      |           |
| Fold change (Post-Pre/Pre)         | 27.6                | 10.3   | 70.8   | Diff (Post-Pre)        | <b>1.29</b>           | <b>1.57</b> |      |           |
| Anti-N IgG against WT SARS-CoV-2   |                     |        |        |                        |                       |             |      |           |
| Control                            | 5.5                 | 3.1    | 9.4    | Control                | -0.78                 | -0.62       | 799  | 1.01      |
| Pre                                | 40.0                | 16.5   | 164.0  | Pre                    | 0.12                  | 0.30        | 788  | 1.01      |
| Post                               | 83.0                | 32.0   | 224.0  | Post                   | 0.41                  | 0.57        | 791  | 1.01      |
|                                    |                     |        |        | Diff (Post-Control)    | 1.05                  | 1.32        |      |           |
|                                    |                     |        |        | Diff (Pre-Control)     | 0.76                  | 1.06        |      |           |
| Fold change (Post-Pre/Pre)         | 0.9                 | 0.0    | 2.5    | Diff (Post-Pre)        | <b>0.14</b>           | <b>0.43</b> |      |           |
| Tetanus toxoid                     |                     |        |        |                        |                       |             |      |           |
| Pre                                | 168.0               | 60.0   | 435.0  | Pre                    | -0.19                 | -0.03       | 763  | 1.01      |
| Post                               | 272.0               | 95.0   | 703.0  | Post                   | 0.03                  | 0.19        | 757  | 1.01      |
| Fold change (Post-Pre/Pre)         | 0.6                 | -0.1   | 2.7    | Diff (Post-Pre)        | <b>0.05</b>           | <b>0.37</b> |      |           |
| RSV G                              |                     |        |        |                        |                       |             |      |           |
| Pre                                | 771.0               | 421.0  | 1255.5 | Pre                    | -0.16                 | -0.07       | 771  | 1.01      |
| Post                               | 1192.0              | 776.0  | 2252.0 | Post                   | 0.07                  | 0.16        | 765  | 1.01      |
| Fold change (Post-Pre/Pre)         | 0.6                 | -0.1   | 2.4    | Diff (Post-Pre)        | <b>0.15</b>           | <b>0.31</b> |      |           |
| A/H1N1pdm09 HA                     |                     |        |        |                        |                       |             |      |           |
| Pre                                | 252.0               | 92.0   | 730.0  | Pre                    | -0.19                 | -0.05       | 982  | 1.00      |
| Post                               | 446.0               | 198.0  | 1052.0 | Post                   | 0.05                  | 0.19        | 990  | 1.00      |
| Fold change (Post-Pre/Pre)         | 0.7                 | -0.1   | 2.6    | Diff (Post-Pre)        | <b>0.10</b>           | <b>0.37</b> |      |           |



| Anti-S IgG against B.1.1.7    |        |       |        |                 |             |             |           |
|-------------------------------|--------|-------|--------|-----------------|-------------|-------------|-----------|
| Pre                           | 36.0   | 13.0  | 147.0  | Pre             | -0.81       | -0.67       | 1227 1.00 |
| Post                          | 1212.0 | 654.0 | 2582.0 | Post            | 0.67        | 0.81        | 1251 1.00 |
| Fold change<br>(Post-Pre/Pre) | 31.2   | 11.0  | 93.8   | Diff (Post-Pre) | <b>1.33</b> | <b>1.62</b> |           |
| Anti-S IgG against B.1.351    |        |       |        |                 |             |             |           |
| Pre                           | 38.0   | 14.0  | 138.5  | Pre             | -0.81       | -0.69       | 1271 1.00 |
| Post                          | 1276.0 | 736.0 | 2844.0 | Post            | 0.69        | 0.81        | 1277 1.00 |
| Fold change<br>(Post-Pre/Pre) | 36.6   | 10.5  | 104.5  | Diff (Post-Pre) | <b>1.37</b> | <b>1.62</b> |           |
| Anti-S IgG against P.1        |        |       |        |                 |             |             |           |
| Pre                           | 25.0   | 9.0   | 89.5   | Pre             | -0.81       | -0.68       | 1048 1.00 |
| Post                          | 824.0  | 469.0 | 1917.0 | Post            | 0.68        | 0.81        | 1052 1.00 |
| Fold change<br>(Post-Pre/Pre) | 31.0   | 10.9  | 103.9  | Diff (Post-Pre) | <b>1.35</b> | <b>1.63</b> |           |

\*ESS = Effective sample size

**Table S4: Bayesian ANOVA regression results: Serum neutralization**

| Serum neutralization (ID <sub>50</sub> )                  |         |                     |         | Bayesian ANOVA results |                       |             |      |           |
|-----------------------------------------------------------|---------|---------------------|---------|------------------------|-----------------------|-------------|------|-----------|
| Variable                                                  | Median  | Interquartile range |         | Variable               | 95% credible interval |             | ESS  | $\hat{R}$ |
|                                                           |         | Lower               | Upper   |                        | Lower                 | Upper       |      |           |
| WT (D614G) SARS-CoV-2 - entire cohort                     |         |                     |         |                        |                       |             |      |           |
| Control                                                   | 1863.0  | 1321.0              | 3020.0  | Control                | -0.16                 | -0.02       | 852  | 1.00      |
| Pre                                                       | 714.0   | 213.0               | 1866.5  | Pre                    | -0.61                 | -0.46       | 855  | 1.00      |
| Post                                                      | 10635.0 | 6312.0              | 17128.0 | Post                   | 0.56                  | 0.67        | 856  | 1.00      |
|                                                           |         |                     |         | Post-Control           | 0.59                  | 0.81        |      |           |
|                                                           |         |                     |         | Pre-Control            | -0.59                 | -0.33       |      |           |
| Fold change (Post-Pre/Pre)                                | 12.5    | 5.2                 | 39.6    | Diff (Post-Pre)        | <b>1.05</b>           | <b>1.27</b> |      |           |
| WT (D614G) SARS-CoV-2 - randomly selected 20 participants |         |                     |         |                        |                       |             |      |           |
| Pre                                                       | 489.5   | 211.4               | 1753.3  | Pre                    | -0.78                 | -0.49       | 1025 | 1.00      |
| Post                                                      | 12902.0 | 7674.0              | 17982.8 | Post                   | 0.49                  | 0.78        | 1027 | 1.00      |
| Fold change (Post-Pre/Pre)                                | 23.4    | 9.5                 | 37.0    | Diff (Post-Pre)        | <b>0.98</b>           | <b>1.56</b> |      |           |
| B.1.1.7                                                   |         |                     |         |                        |                       |             |      |           |
| Pre                                                       | 398.4   | 100.0               | 1068.8  | Pre                    | -0.82                 | -0.52       | 1171 | 1.00      |
| Post                                                      | 8261.5  | 7052.5              | 11410.8 | Post                   | 0.52                  | 0.82        | 1159 | 1.00      |
| Fold change (Post-Pre/Pre)                                | 29.8    | 7.2                 | 70.4    | Diff (Post-Pre)        | <b>1.05</b>           | <b>1.64</b> |      |           |
| B.1.351                                                   |         |                     |         |                        |                       |             |      |           |
| Pre                                                       | 190.4   | 100.0               | 885.3   | Pre                    | -0.69                 | -0.33       | 1069 | 1.00      |
| Post                                                      | 3297.5  | 1767.0              | 7220.0  | Post                   | 0.33                  | 0.69        | 1050 | 1.00      |
| Fold change (Post-Pre/Pre)                                | 9.1     | 6.4                 | 21.2    | Diff (Post-Pre)        | <b>0.67</b>           | <b>1.37</b> |      |           |
| P.1                                                       |         |                     |         |                        |                       |             |      |           |
| Pre                                                       | 438.8   | 105.9               | 1364.0  | Pre                    | -0.73                 | -0.39       | 1465 | 1.00      |
| Post                                                      | 7099.5  | 3940.3              | 11111.8 | Post                   | 0.39                  | 0.73        | 1481 | 1.00      |
| Fold change (Post-Pre/Pre)                                | 10.5    | 5.7                 | 36.8    | Diff (Post-Pre)        | <b>0.78</b>           | <b>1.46</b> |      |           |
| WT(D614G) v. B.1.1.7 (Pre-vaccination)                    |         |                     |         |                        |                       |             |      |           |
| WT                                                        | 489.5   | 211.4               | 1753.3  | WT                     | -0.08                 | 0.25        | 1011 | 1.01      |
| VOC                                                       | 398.4   | 100.0               | 1068.8  | VOC                    | -0.25                 | 0.08        | 1002 | 1.01      |
|                                                           |         |                     |         | Diff (VOC-WT)          | -0.50                 | 0.16        |      |           |
| WT(D614G) v. B.1.351 (Pre-vaccination)                    |         |                     |         |                        |                       |             |      |           |
| WT                                                        | 489.5   | 211.4               | 1753.3  | WT                     | -0.07                 | 0.28        | 956  | 1.00      |
| VOC                                                       | 190.4   | 100.0               | 885.3   | VOC                    | -0.28                 | 0.07        | 945  | 1.00      |
|                                                           |         |                     |         | Diff (VOC-WT)          | -0.56                 | 0.13        |      |           |
| WT(D614G) v. P.1 (Pre-vaccination)                        |         |                     |         |                        |                       |             |      |           |
| WT                                                        | 489.5   | 211.4               | 1753.3  | WT                     | -0.11                 | 0.21        | 465  | 1.01      |
| VOC                                                       | 438.8   | 105.9               | 1364.0  | VOC                    | -0.21                 | 0.11        | 471  | 1.01      |
|                                                           |         |                     |         | Diff (VOC-WT)          | -0.42                 | 0.23        |      |           |

| WT(D614G) v. B.1.1.7 (Post-vaccination) |         |        |         |                 |              |              |           |
|-----------------------------------------|---------|--------|---------|-----------------|--------------|--------------|-----------|
| WT                                      | 12902.0 | 7674.0 | 17982.8 | WT              | -0.04        | 0.14         | 688 1.01  |
| VOC                                     | 8261.5  | 7052.5 | 11410.8 | VOC             | -0.14        | 0.04         | 698 1.01  |
|                                         |         |        |         | Diff (VOC-WT)   | -0.28        | 0.07         |           |
| WT(D614G) v. B.1.351 (Post-vaccination) |         |        |         |                 |              |              |           |
| WT                                      | 12902.0 | 7674.0 | 17982.8 | WT              | 0.12         | 0.38         | 1065 1.00 |
| VOC                                     | 3297.5  | 1767.0 | 7220.0  | VOC             | -0.38        | -0.12        | 1076 1.01 |
|                                         |         |        |         | Diff (VOC-WT)   | <b>-0.76</b> | <b>-0.23</b> |           |
| WT(D614G) v. P.1 (Post-vaccination)     |         |        |         |                 |              |              |           |
| WT                                      | 12902.0 | 7674.0 | 17982.8 | WT              | -0.01        | 0.24         | 976 1.00  |
| VOC                                     | 7099.5  | 3940.3 | 11111.8 | VOC             | -0.24        | 0.01         | 978 1.00  |
|                                         |         |        |         | Diff (VOC-WT)   | -0.48        | 0.02         |           |
| B.1.1.7/WT ratio                        |         |        |         |                 |              |              |           |
| Pre                                     | 0.82    | 0.56   | 1.06    | Pre             | -0.14        | 0.14         | 738 1.00  |
| Post                                    | 0.73    | 0.58   | 1.02    | Post            | -0.14        | 0.14         | 676 1.00  |
|                                         |         |        |         | Diff (Post-Pre) | -0.28        | 0.28         |           |
| B.1.351/WT ratio                        |         |        |         |                 |              |              |           |
| Pre                                     | 0.85    | 0.53   | 1.00    | Pre             | 0.04         | 0.45         | 937 1.00  |
| Post                                    | 0.36    | 0.20   | 0.44    | Post            | -0.45        | -0.04        | 895 1.01  |
|                                         |         |        |         | Diff (Post-Pre) | <b>-0.90</b> | <b>-0.08</b> |           |
| P.1/WT ratio                            |         |        |         |                 |              |              |           |
| Pre                                     | 0.90    | 0.69   | 1.36    | Pre             | -0.03        | 0.38         | 742 1.00  |
| Post                                    | 0.59    | 0.44   | 0.80    | Post            | -0.38        | 0.03         | 737 1.00  |
|                                         |         |        |         | Diff (Post-Pre) | -0.76        | 0.05         |           |

\*ESS = Effective sample size

**Table S5: Characteristics of study participants included in vaccine response - meta variables regression analysis**

|                                                                                                 | No. of participants (%) |
|-------------------------------------------------------------------------------------------------|-------------------------|
| Total                                                                                           | 139                     |
| Age (median = 50y. range = (22y. 80y))                                                          |                         |
| ≥45 y                                                                                           | 53 (38.1%)              |
| 46-65 y                                                                                         | 63 (45.3%)              |
| >65 y                                                                                           | 23 (16.5%)              |
| Sex                                                                                             |                         |
| Female                                                                                          | 53 (38.1%)              |
| Male                                                                                            | 86 (61.9%)              |
| Severity                                                                                        |                         |
| Mild                                                                                            | 49 (35.3%)              |
| Moderate                                                                                        | 62 (44.6%)              |
| Severe                                                                                          | 13 (9.4%)               |
| Critical                                                                                        | 15 (10.8%)              |
| Time between symptom onset and vaccination<br>(median = 9 months; range = (1 month. 15 months)) |                         |
| ≥6 months                                                                                       | 47 (33.8%)              |
| 7-12 months                                                                                     | 58 (41.7%)              |
| >12 months                                                                                      | 34 (24.5%)              |
| Comorbidities                                                                                   |                         |
| Cancer                                                                                          | 8 (5.8%)                |
| Cardiovascular disease                                                                          | 23 (16.5%)              |
| Chronic respiratory disease                                                                     | 19 (13.7%)              |
| Diabetes Mellitus                                                                               | 10 (7.2%)               |
| Obesity                                                                                         | 25 (18.0%)              |

**Table S6: Bayesian multilevel regression results: Post-vaccination neutralization titers v. participants' metadata.**

| Variable                       | With B.1.1.7          |       |      |           | Without B.1.1.7       |       |      |           |
|--------------------------------|-----------------------|-------|------|-----------|-----------------------|-------|------|-----------|
|                                | 95% credible interval |       | ESS* | $\hat{R}$ | 95% credible interval |       | ESS  | $\hat{R}$ |
| Lower                          | Upper                 | Lower |      |           | Upper                 |       |      |           |
| Age                            | -0.29                 | -0.05 | 5758 | 1.00      | -0.29                 | -0.04 | 6872 | 1.00      |
| Sex                            | 0.04                  | 0.32  | 4732 | 1.00      | 0.03                  | 0.32  | 6387 | 1.00      |
| Severity                       | -0.02                 | 0.17  | 4242 | 1.00      | -0.01                 | 0.17  | 6681 | 1.00      |
| Time since symptom onset       | -0.07                 | 0.15  | 4148 | 1.00      | -0.09                 | 0.13  | 6196 | 1.00      |
| Pre-vaccination neutralization | 0.16                  | 0.45  | 2258 | 1.00      | 0.18                  | 0.47  | 3359 | 1.00      |
| Cancer                         | -0.48                 | 0.21  | 3667 | 1.00      | -0.48                 | 0.19  | 7007 | 1.00      |
| Cardiovascular disease         | -0.18                 | 0.27  | 3959 | 1.00      | -0.19                 | 0.27  | 5622 | 1.00      |
| Chronic respiratory disease    | -0.32                 | 0.12  | 1540 | 1.00      | -0.31                 | 0.12  | 5602 | 1.00      |
| Diabetes Mellitus              | -0.48                 | 0.1   | 5077 | 1.00      | -0.49                 | 0.08  | 7814 | 1.00      |
| Obesity                        | -0.14                 | 0.23  | 6954 | 1.00      | -0.12                 | 0.25  | 7814 | 1.00      |
| B.1.1.7 infection              | -0.88                 | 0.06  | 4479 | 1.00      |                       |       |      |           |

\*ESS = Effective sample size

## Supplementary Methods

To identify and estimate the effect size of different predictor variables on the observed pseudovirus SARS-CoV-2 neutralization data, we used a Bayesian hierarchical model that partially pooled effect size estimates across all study participants  $l$ . We assumed a linear correlation between the mean-centered predicted log neutralization values  $\langle Y \rangle$  and predictor variables  $X_i$ :

$$\langle Y \rangle = \beta_{l,0} + \sum_i \beta_{l,i} X_i$$

where  $\beta_{l,i}$  is the normalized effects of variable  $i$  for participant  $l$  and  $\beta_{l,0}$  is the participant-specific intercept.

We assumed that the observed mean-centered and scaled neutralization values  $Y$  follow a Student-T distribution about the predicted  $\langle Y \rangle$  with error-term standard deviation  $\sigma_Y$  with  $\nu_Y$  degrees of freedom:

$$Y \sim T(\nu_Y, \langle Y \rangle, \sigma_Y)$$

We assumed that  $\nu$  is exponentially distributed with a mean of 30 such that high prior probability was allocated over parameter values that describe the range from normal to heavy-tailed data under the Student-T distribution (Kruschke, 2011):

$$\nu \sim \text{Exp}\left(\frac{1}{30}\right)$$

The intercepts  $\beta_{l,0}$  were assumed to be normally distributed about a common mean intercept  $\langle \beta_0 \rangle$  with standard deviation  $\sigma_{\beta_0}$ :

$$\beta_{l,0} \sim N(\langle \beta_0 \rangle, \sigma_{\beta_0})$$

The participant-specific effect sizes  $\beta_{l,i}$  of variable  $i$  were assumed to be normally distributed about a common mean effect size  $\langle \beta_i \rangle$  with a predictor-specific standard deviation  $\sigma_{\beta_i}$ :

$$\beta_{l,i} \sim N(\langle \beta_i \rangle, \sigma_{\beta_i})$$

Weakly informative priors were placed on all standard deviation terms to constrain parameter inferences within biologically and mathematically plausible values (Gelman, 2006):

$$\sigma_Y \sim \text{Half-Normal}(0.1)$$

$$\sigma_{\beta_0} \sim \text{Half-Normal}(0.1)$$

$$\sigma_{\beta_i} \sim \text{Half-Normal}(0.1)$$

A weakly informative Gaussian prior was also placed for the mean intercept  $\langle \beta_0 \rangle$  while a weakly informative Student-T prior was placed on the mean effect size  $\langle \beta_i \rangle$  for each predictor  $i$ :

$$\langle \beta_0 \rangle \sim N(0.1)$$

$$\langle \beta_i \rangle \sim T(3, 0, 2.5)$$

We performed three different analyses with the aforementioned model correlating different predictors to mean-centered log neutralisation values (Table S1).

We also implemented a Bayesian hierarchical generalisation of the one-way ANOVA model to estimate the bounds on the effects of individual groups  $j$  of a nominal predictor  $i$  on an observed metric variable. We assumed that the predicted mean-centered metric variable  $\langle Y_i \rangle$  is given by:

$$\langle Y_i \rangle = \beta_{i,0} + \sum_j \beta_{i,j} x_{i,j}$$

where  $x_{i,j}$  is a Boolean variable denoting if an individual belongs to subgroup  $j$  for the nominal predictor  $i$ .

We assumed that the observed metric data ( $Y_i$ ) can be described by the Student-t distribution with  $\nu$  degrees of freedom. the predicted location  $\langle Y_i \rangle$  and heterogenous variances for individual groups  $\sigma_{i,[j]}$ :

$$Y \sim T(\nu, \langle Y_i \rangle, \sigma_{i,[j]})$$

The intercept  $\beta_{i,0}$  was again placed with a weakly informative Gaussian prior:

$$\beta_{i,0} \sim N(0,1)$$

We placed Student-T prior on the effect size  $\beta_{i,j}$  for each subgroup  $j$  of nominal predictor  $i$  centered around zero. with weakly-informative gamma prior on  $\nu_\beta$  degrees of freedom and positive-constrained half-normal prior on the standard deviation error-term  $\sigma_\beta$ :

$$\begin{aligned} \beta_{i,j} &\sim T(\nu_\beta, 0, \sigma_\beta) \\ \nu_\beta &\sim \text{Gamma}(2, 0.1) \\ \sigma_\beta &\sim \text{Half-Normal}(0.1) \end{aligned}$$

Following Kruschke (Kruschke, 2011). we assumed that  $\nu$  is exponentially distributed with a mean of 30 such that high prior probability was allocated over parameter values that describe the range from normal to heavy-tailed data under the Student-T distribution:

$$\nu \sim \text{Exp}\left(\frac{1}{30}\right)$$

As mentioned earlier. we assumed a heterogenous scale term  $\sigma_{i,j}$  for each subgroup  $j$  that follows a gamma distribution with mode  $\omega$  and standard deviation  $\sigma_\sigma$ . We placed vague gamma priors on both  $\omega$  and  $\sigma_\sigma$  that are broad on the scale of the data by estimating the shape ( $k$ ) and scale ( $\theta$ ) of the priors such that the mode and standard deviation equal to  $\frac{\sigma_{Y_{obs}}}{2}$  and  $2\sigma_{Y_{obs}}$  respectively:

$$\begin{aligned} \sigma_{i,j} &\sim \text{Gamma}\left(k = 1 + \frac{\omega}{\theta}, \theta = \frac{2\sigma_\sigma^2}{\omega + \sqrt{\omega^2 + 4\sigma_\sigma^2}}\right) \\ \omega \text{ or } \sigma_\sigma &\sim \text{Gamma}\left(k = 1 + \frac{\sigma_{Y_{obs}}}{2\theta}, \theta = \frac{2(2\sigma_{Y_{obs}})^2}{\frac{\sigma_{Y_{obs}}}{2} + \sqrt{\left(\frac{\sigma_{Y_{obs}}}{2}\right)^2 + 4(2\sigma_{Y_{obs}})^2}}\right) \end{aligned}$$

We fitted all Bayesian models using Markov Chain Monte carlo (MCMC) with pymc3 (Salvatier et al., 2016). implementing a no-u-turn sampler. Four MCMC chains were ran with at least 4000 burn-in steps and 2000 saved posterior samples. Convergence for all parameters were

verified by checking trace plots. ensuring their  $\hat{R}$  values were  $< 1.05$  with sufficient effective sample size ( $>200$ ).

## References

- Gelman A. 2006. Prior distributions for variance parameters in hierarchical models (comment on article by Browne and Draper). *Bayesian Anal* **1**:515–534. doi:10.1214/06-BA117A
- Kruschke JK. 2011. Doing Bayesian data analysis : a tutorial with R and BUGS. Academic Press.
- Salvatier J. Wiecki T V. Fonnesbeck C. 2016. Probabilistic programming in Python using PyMC3. *PeerJ Comput Sci* **2**:e55. doi:10.7717/peerj-cs.55
